# Supplementary material for: Efficacy of Trichoderma longibrachiatum Trichogin GA IV Peptaibol analogs against the Black Rot Pathogen Xanthomonas campestris pv. campestris and other Phytopathogenic Bacteria
Source: MDPI journal article supplement (doi:10.3390/microorganisms11020480), 2023-02-14
Supplement: s1 [file s1]

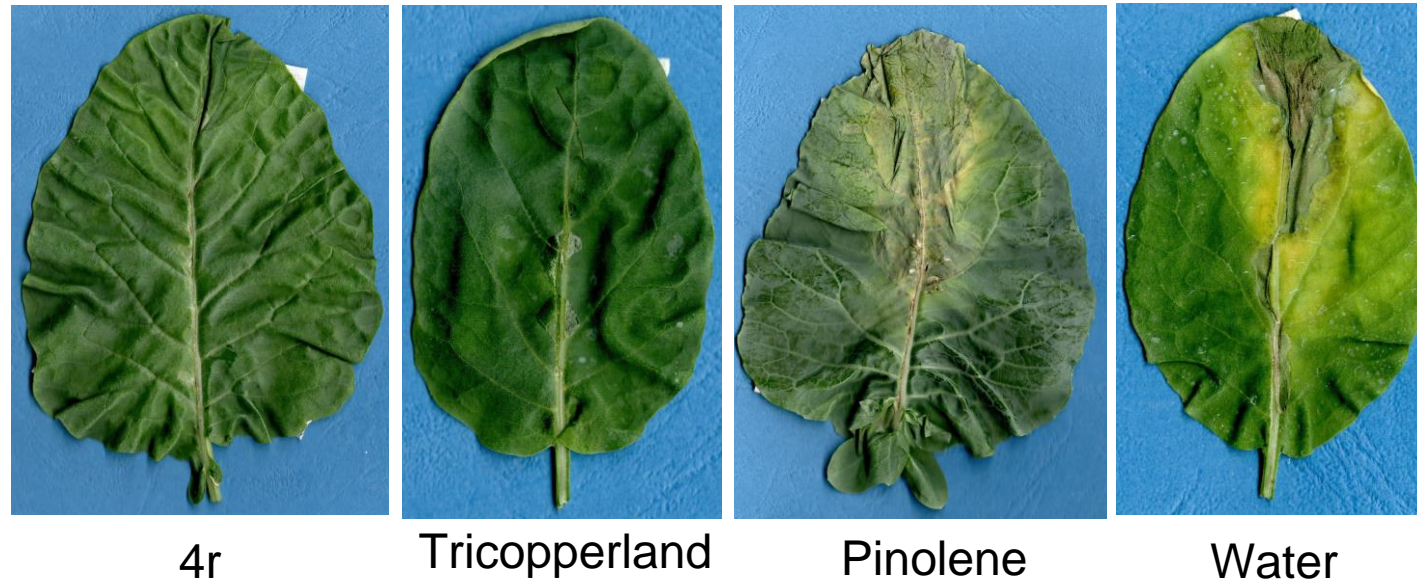

**Figure S1.** Disease symptoms caused by *Xanthomonas campestris* pv. *campestris* (Xcc) on cauliflower cv. “Palla di neve” leaves subjected to treatments with peptide 4r supplemented with pinolene (adjuvant) in comparison with tribasic copper sulfate (Tricopperland), pinolene or water treatments.
